# Supplementary material for: Improved oxygen reduction reaction activity of three-dimensional porous N-doped graphene from a soft-template synthesis strategy in microbial fuel cells
Source: Royal Society of Chemistry journal article supplement (doi:10.1039/c6ra23971d), 2016-01-01
Supplement: c6ra23971d1.pdf [file c6ra23971d1.pdf]

## Supplementary Information

### Improved oxygen reduction reaction activity of three-dimensional porous N-doped graphene from soft-template synthesis strategy in microbial fuel cells

Yuan Liu, Xiao-Jun Jin, Ai-Xue Tuo, Hong Liu\*

Chongqing Institute of Green and Intelligent Technology, Chinese Academy of Sciences, Chongqing 400714, China

#### Table of Contents:

**Fig. S1.** Zeta potentials of GO-CTAB mixed solutions with different CTAB dosage.

**Fig. S2.** SEM images of PNG-0 (a and b), PNG-5 (c and d), PNG-10 (e and f) and PNG-20 (g and h).

**Fig. S3.** High resolution of N1s of PNG-0 (a), PNG-5 (b), PNG-10 (c) and PNG-20 (d); N1: pyridinic N, N2: pyrrolic N, N3: graphitic N.

**Fig. S4.** Cyclic voltammograms of PNG-0 (a), PNG-5 (b), PNG-10 (c), PNG-20 (d) and Pt/C (e).

**Fig. S5.** Polarization curves of ORR on PNG-0 (a), PNG-5 (b), PNG-10(c), PNG-20 (d) and Pt/C (e) at different rotary rates; inset is the Koutecky-Levich plots.

**Fig. S6.** Current-potential profiles (a) and corresponding H<sub>2</sub>O<sub>2</sub> yield and electron transfer number results (b) at rotation rate of 1600 rpm from RRDE tests of PNG-X.

**Fig. S7.** Time-course variations of maximum voltage output and power density of MFCs equipped with different cathode electrocatalysts.

**Fig. S8.** Photographs of the raw and 70-day used air cathode of Pt/C (a, b), PNG-15 (c, d) and PNG-0 (e, f), respectively.

---

\* Corresponding author: liuhong@cigit.ac.cn

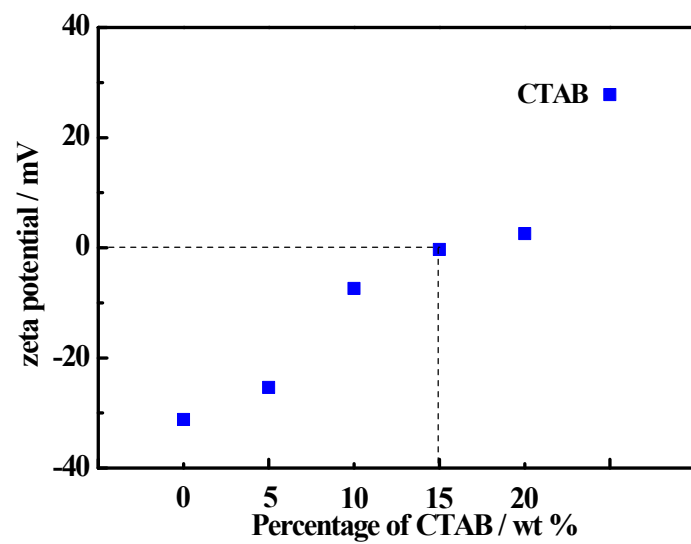

Fig. S1.

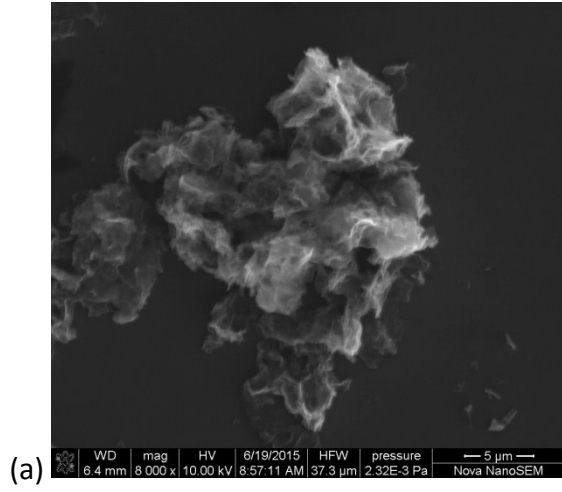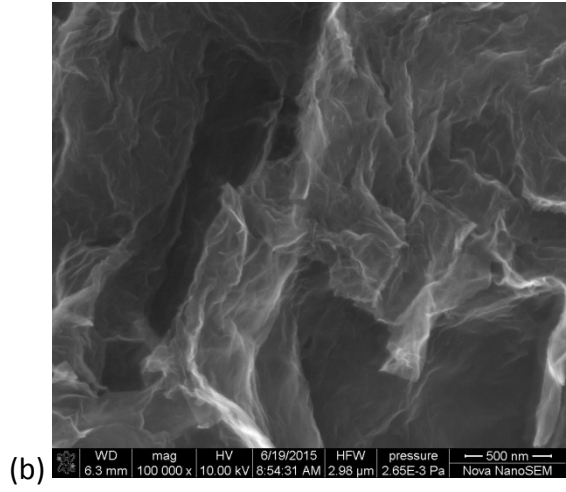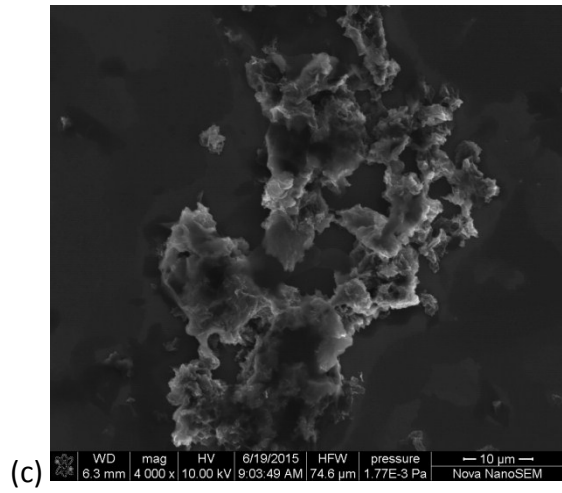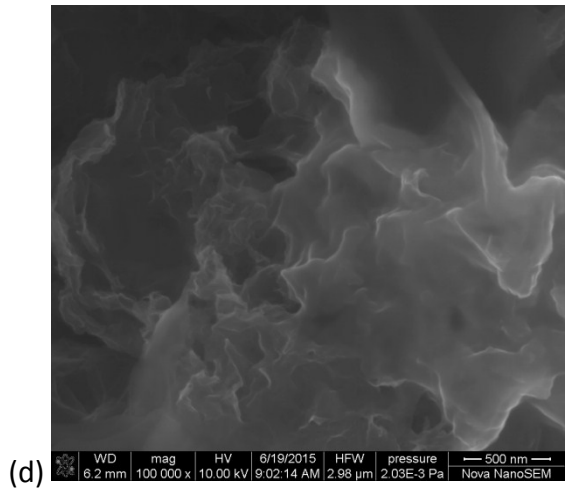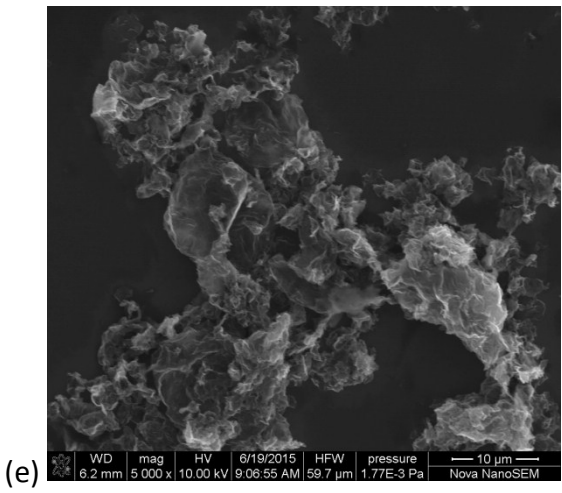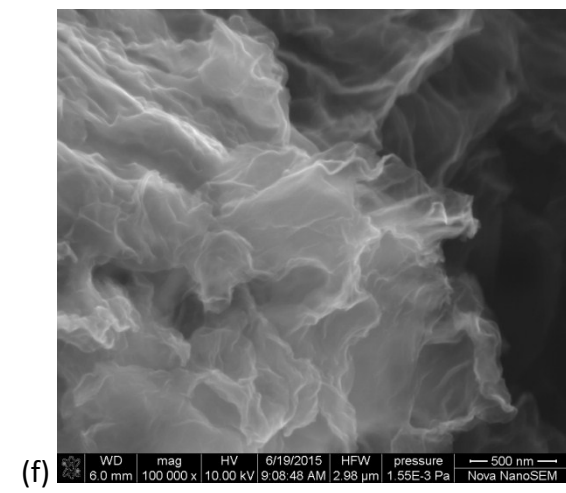

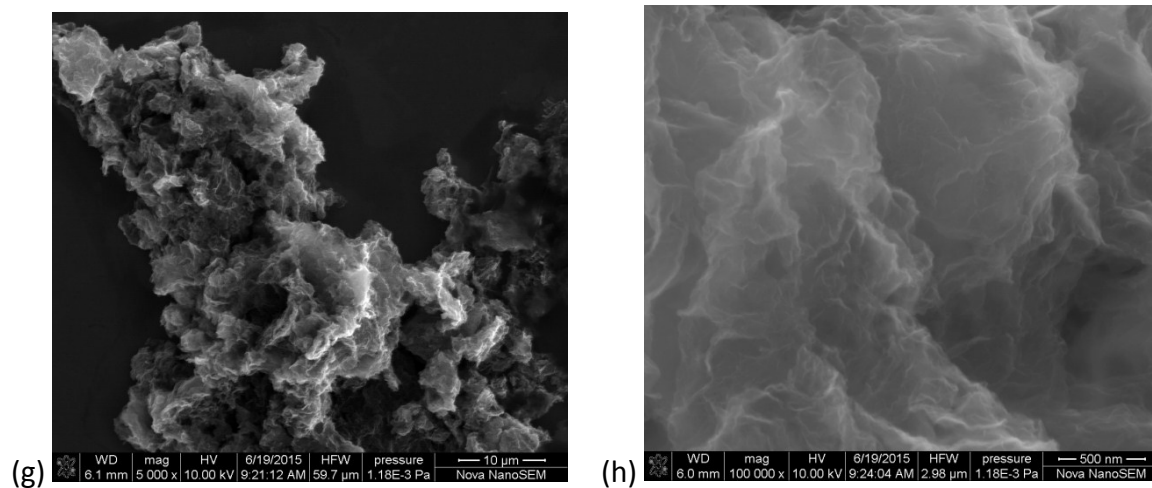

Fig. S2.

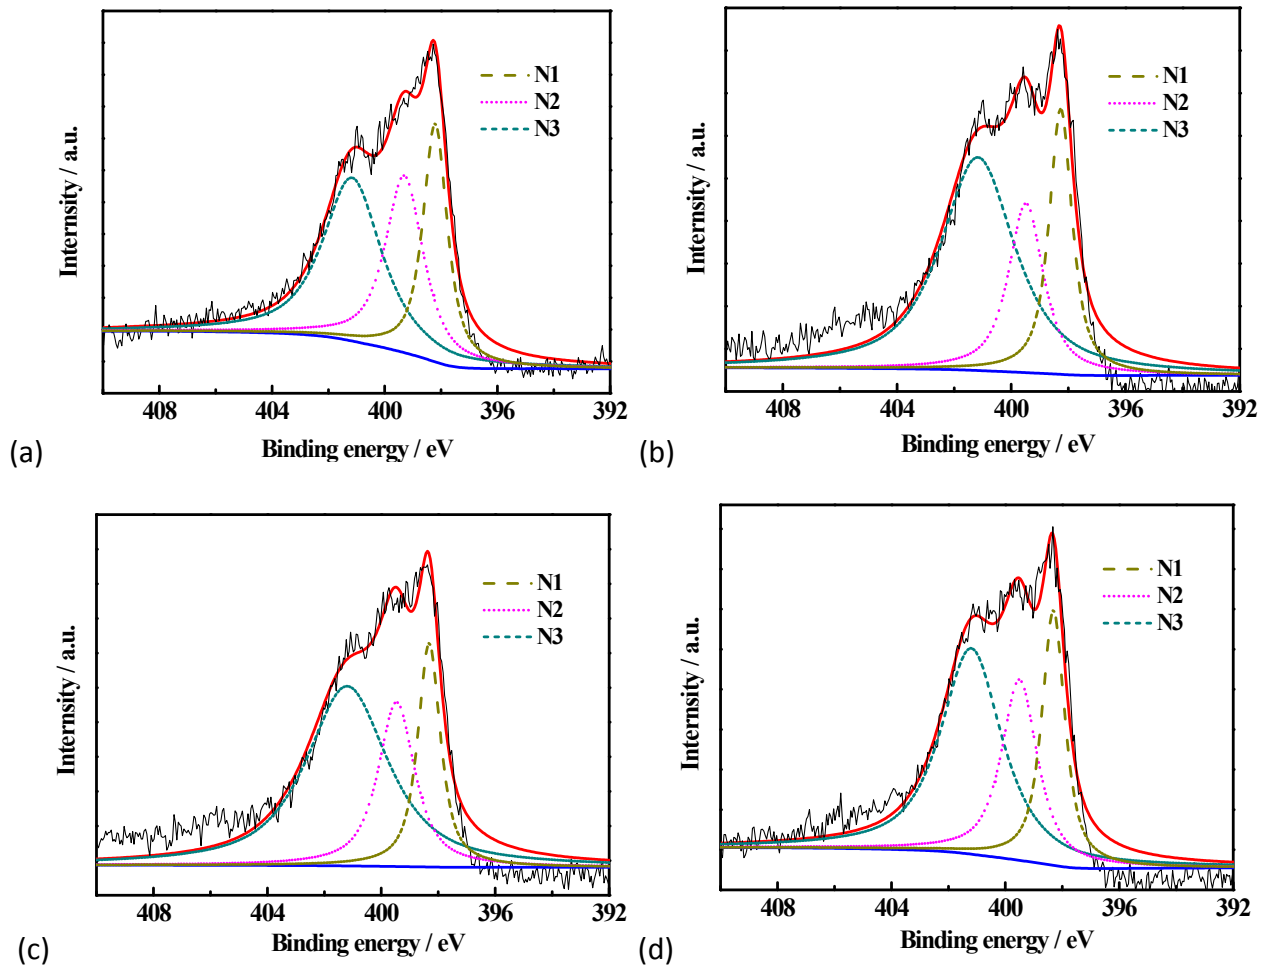

Fig. S3.

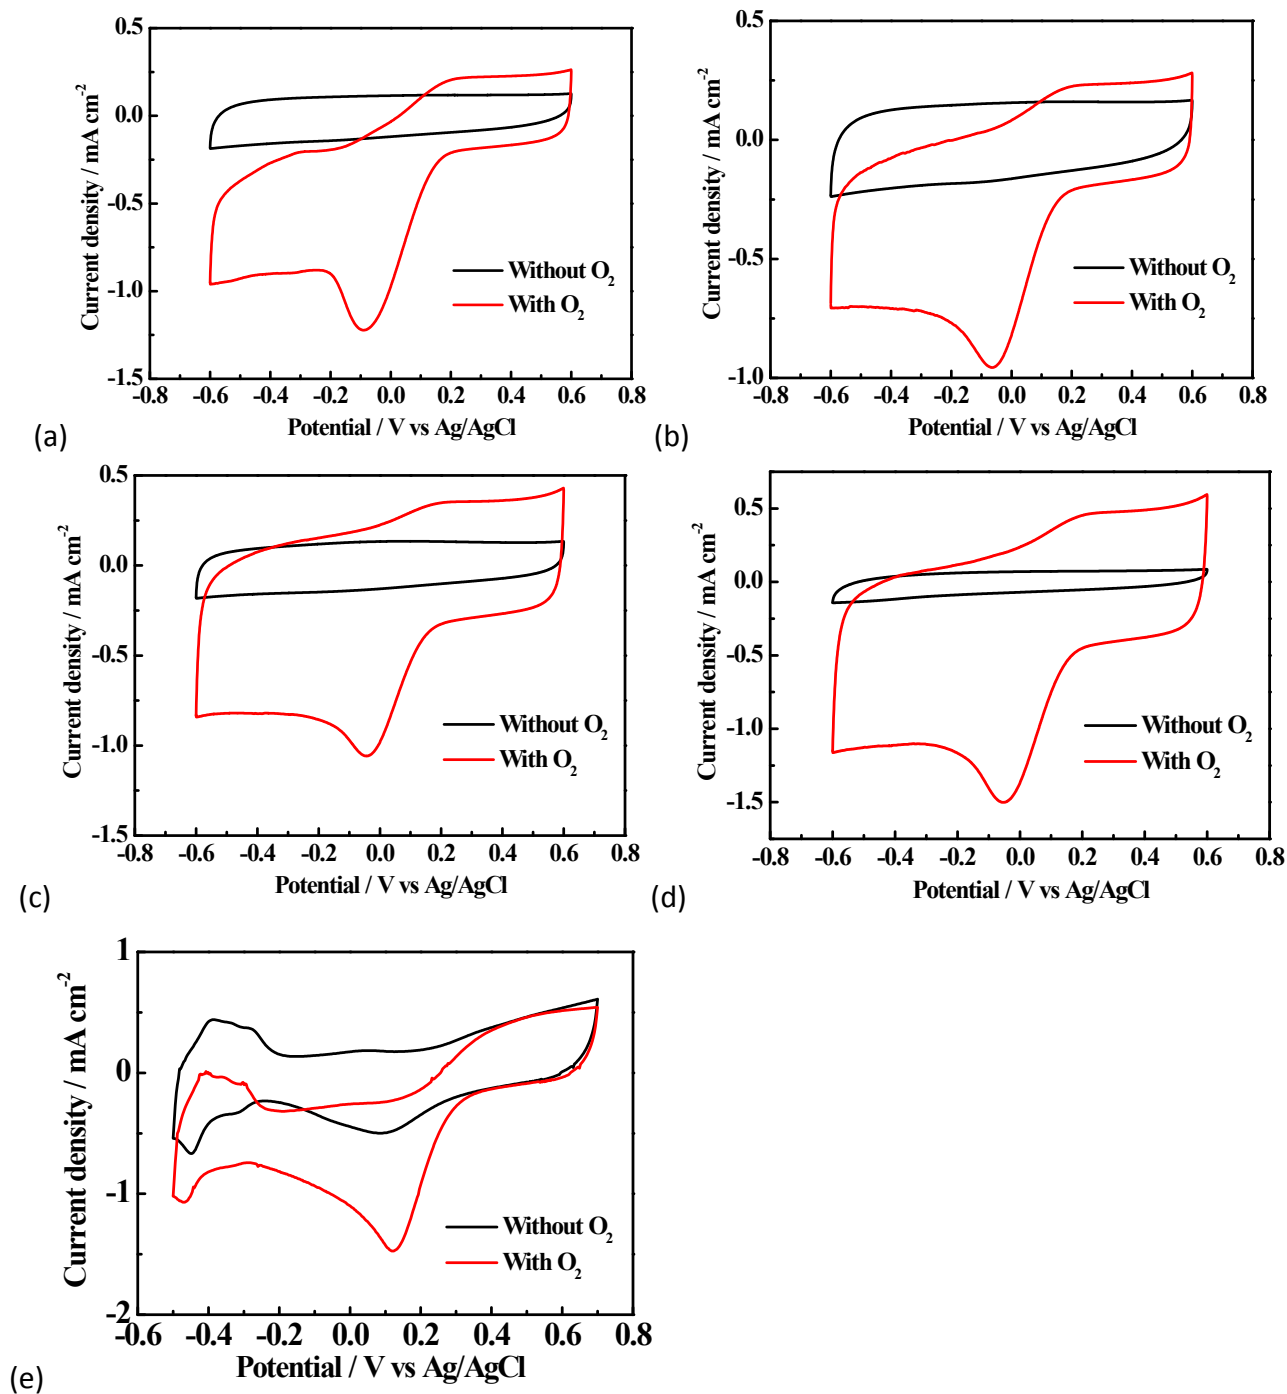

Fig. S4.

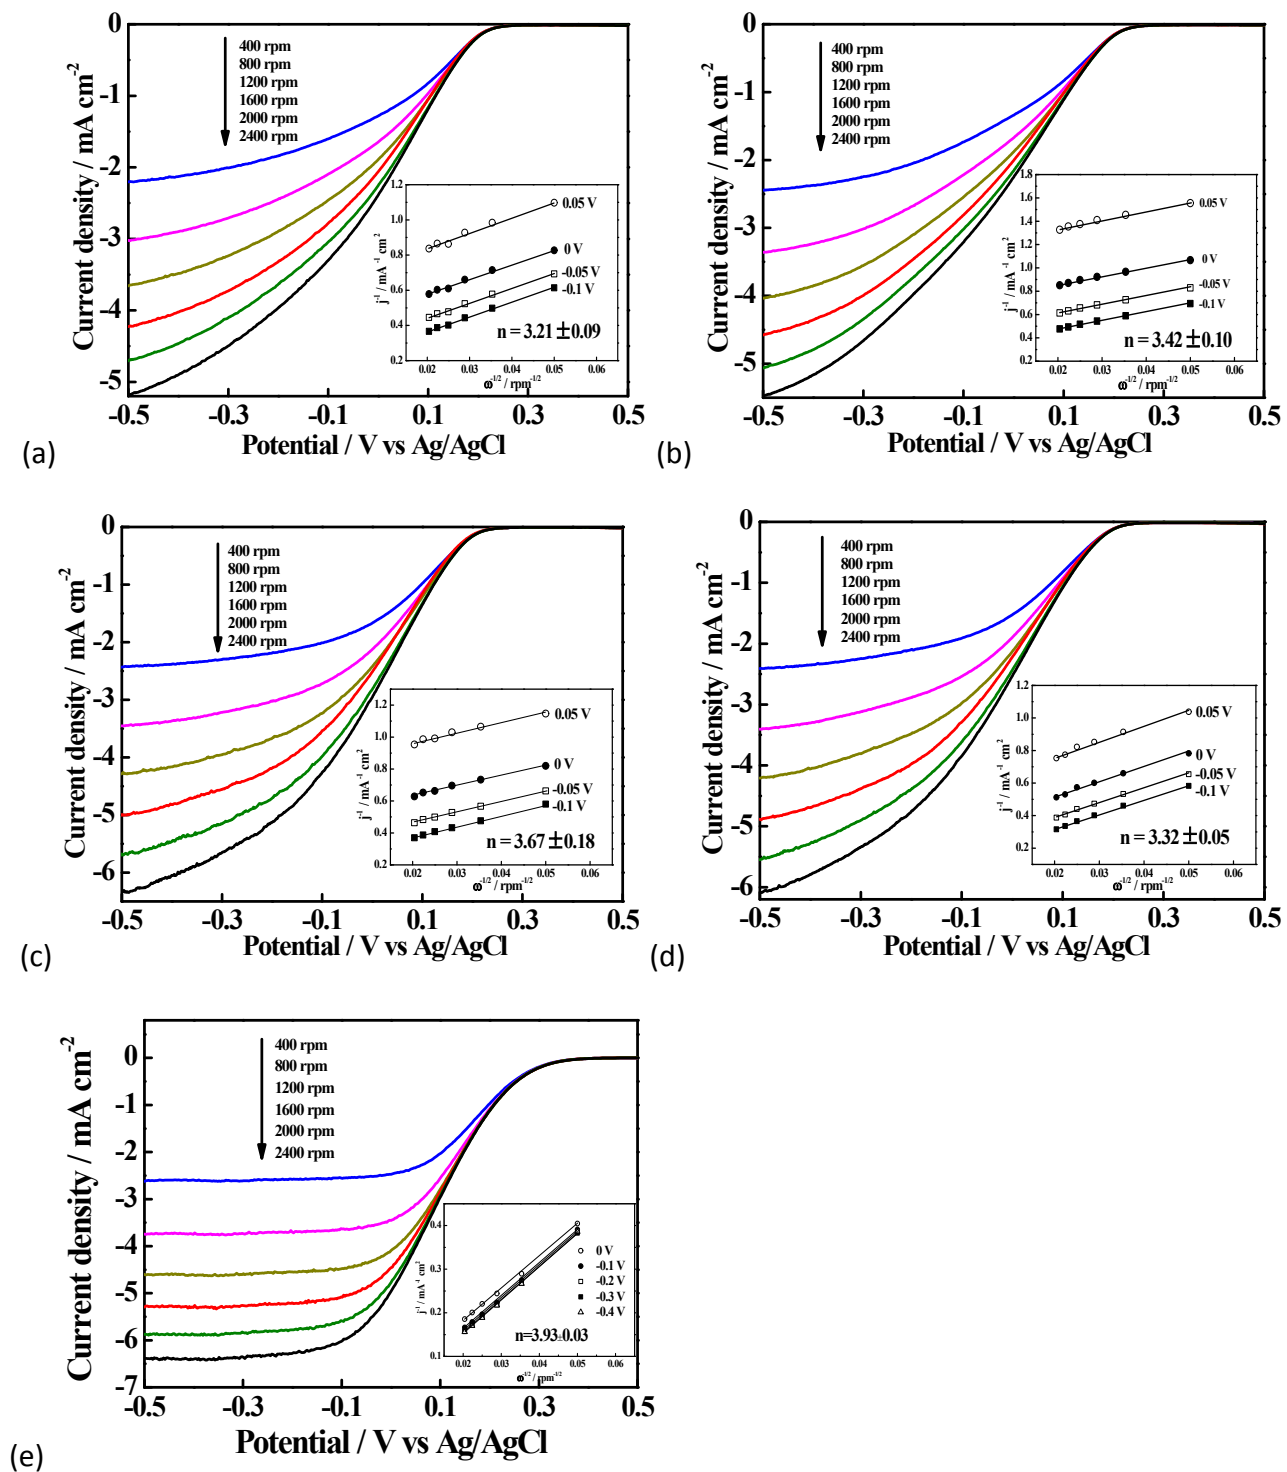

Fig. S5.

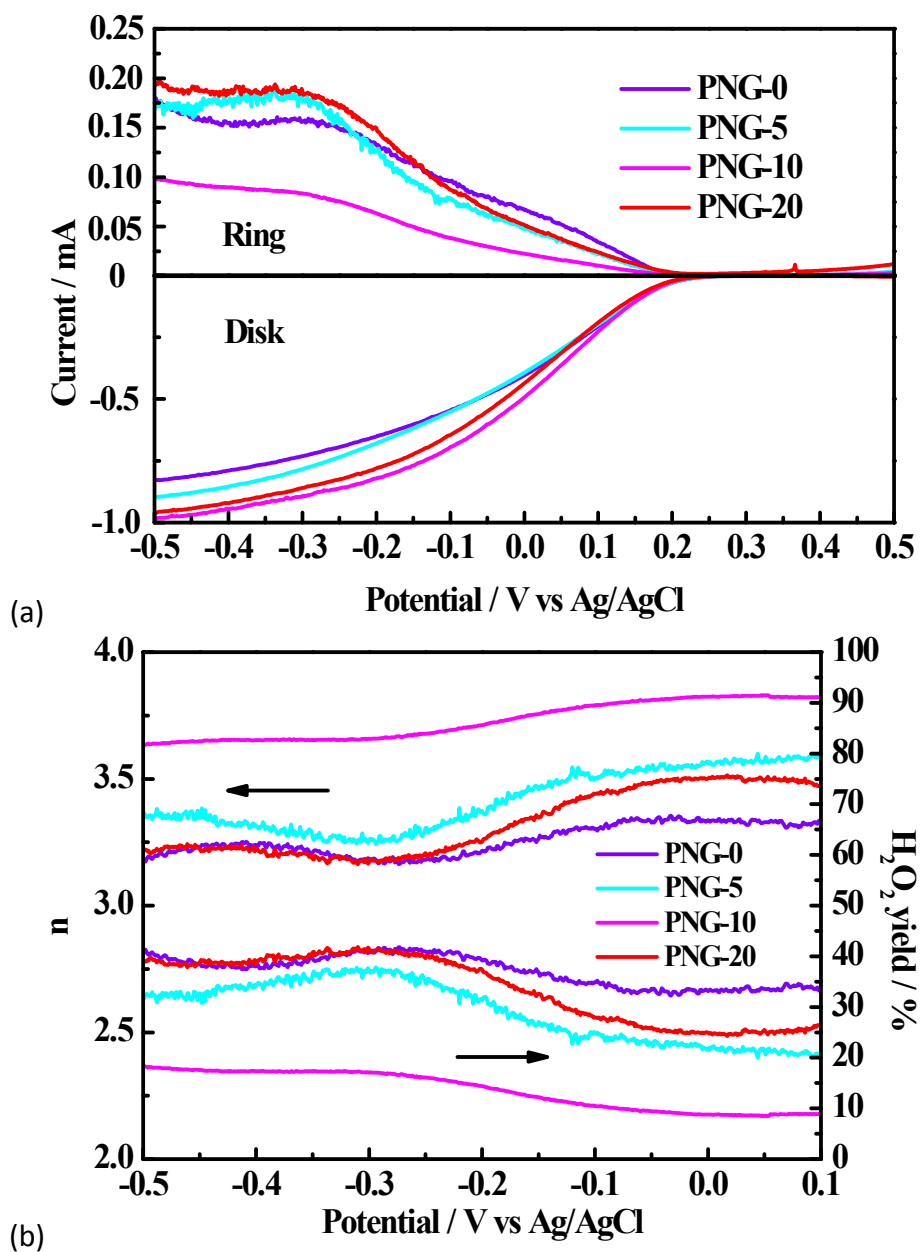

Fig. S6.



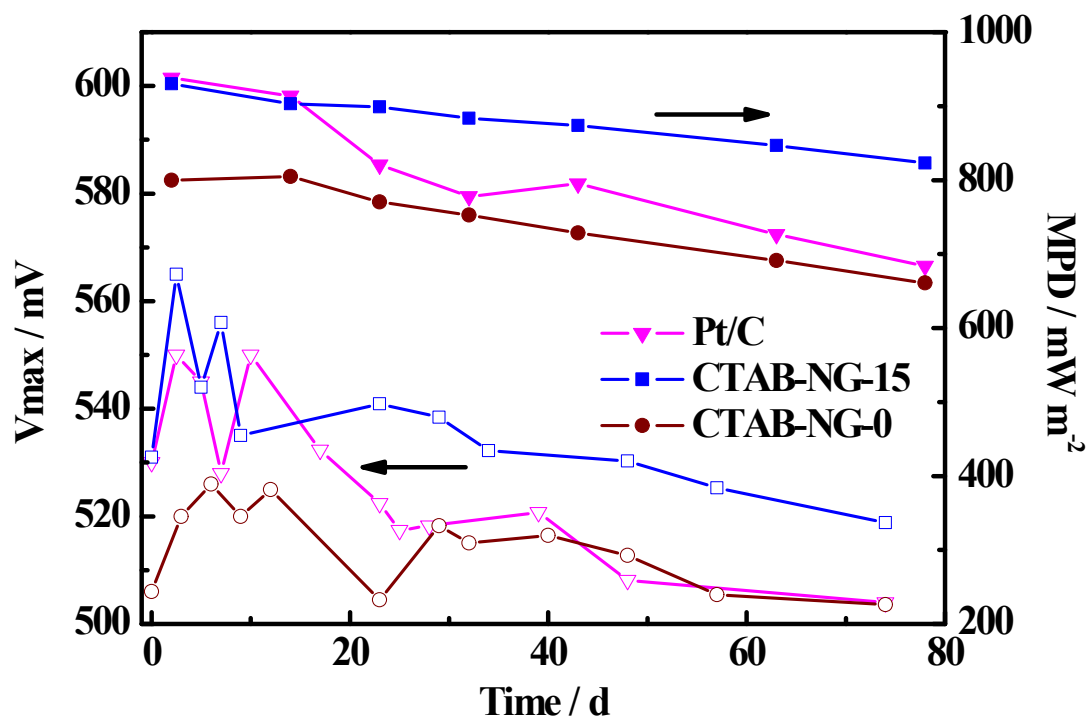

Fig. S7.

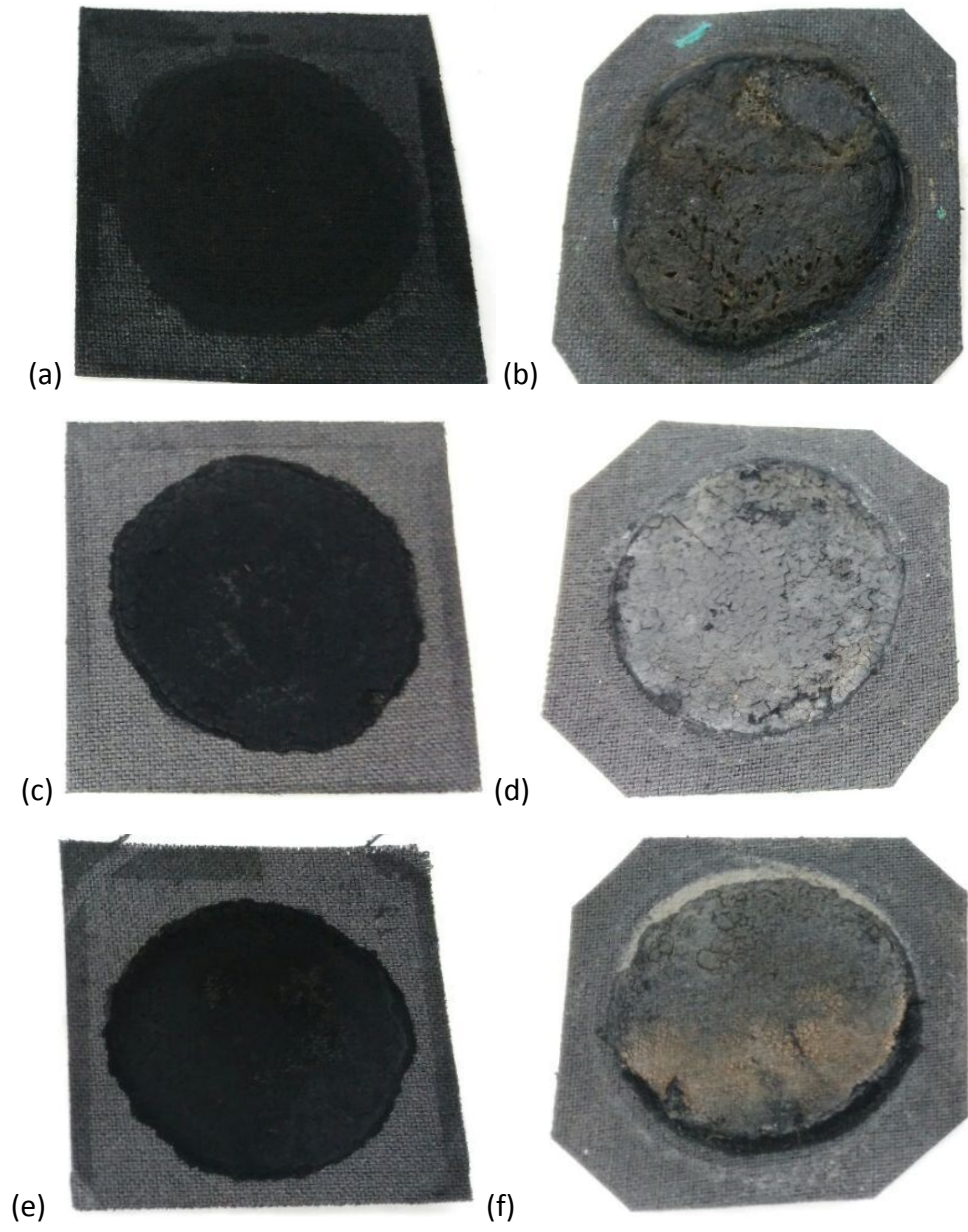

**Fig. S8.**
